# Supplementary material
Source: publisher figshare collection journal article supplement (https://rs.figshare.com/ndownloader/files/13292504)
Supplement: Supplementary file 1 [file 13292504]

## Sheet: raw_data-eggs
	qPCR to quantify the genomic DNA of the symbiont per individual egg
run	Sample Name	Detector	Task	Ct	StdDev Ct	Qty
	rhlE_std1	rhlE_egg_SYBR	Standard	19.87	0.239	1000000
	rhlE_std1	rhlE_egg_SYBR	Standard	19.88	0.239	1000000
	rhlE_std1	rhlE_egg_SYBR	Standard	20.29	0.239	1000000
	rhlE_std2	rhlE_egg_SYBR	Standard	23.46	0.059	100000
	rhlE_std2	rhlE_egg_SYBR	Standard	23.56	0.059	100000
	rhlE_std2	rhlE_egg_SYBR	Standard	23.57	0.059	100000
	rhlE_std3	rhlE_egg_SYBR	Standard	27.02	0.043	10000
	rhlE_std3	rhlE_egg_SYBR	Standard	27.05	0.043	10000
	rhlE_std3	rhlE_egg_SYBR	Standard	27.11	0.043	10000
	rhlE_std4	rhlE_egg_SYBR	Standard	30.37	0.102	1000
	rhlE_std4	rhlE_egg_SYBR	Standard	30.17	0.102	1000
	rhlE_std4	rhlE_egg_SYBR	Standard	30.23	0.102	1000
	rhlE_std5	rhlE_egg_SYBR	Standard	33.55	0.35	100
	rhlE_std5	rhlE_egg_SYBR	Standard	34.21	0.35	100
	rhlE_std5	rhlE_egg_SYBR	Standard	33.69	0.35	100
	SW_1	rhlE_egg_SYBR	NTC	Undetermined
	SW_2	rhlE_egg_SYBR	NTC	Undetermined
	Egg_1	rhlE_egg_SYBR	Unknown	29.28		2080.58
	Egg_2	rhlE_egg_SYBR	Unknown	29.23		2145.53
	Egg_3	rhlE_egg_SYBR	Unknown	27.87		5362.6
	Egg_4	rhlE_egg_SYBR	Unknown	28.11		4547.41
	Egg_5	rhlE_egg_SYBR	Unknown	28.96		2580.1
	Egg_6	rhlE_egg_SYBR	Unknown	28.08		4647.37
	Egg_1	rhlE_egg_SYBR	Unknown	27.86		5381.19
	Egg_2	rhlE_egg_SYBR	Unknown	28.76		2940.77
	Egg_3	rhlE_egg_SYBR	Unknown	28.12		4532.08
	Egg_4	rhlE_egg_SYBR	Unknown	27.77		5707.2
	Egg_5	rhlE_egg_SYBR	Unknown	28.31		3974.66
	Egg_6	rhlE_egg_SYBR	Unknown	28.35		3873.97
	Egg_1	rhlE_egg_SYBR	Unknown	26.99		9635.82
	Egg_2	rhlE_egg_SYBR	Unknown	27.35		7592.06
	Egg_3	rhlE_egg_SYBR	Unknown	27.54		6663.45
	Egg_4	rhlE_egg_SYBR	Unknown	27.76		5769.46
	Egg_5	rhlE_egg_SYBR	Unknown	27.35		7579.66
	Egg_6	rhlE_egg_SYBR	Unknown	27.41		7287.08
	Egg_1	rhlE_egg_SYBR	Unknown	27.58		6498.74
	Egg_2	rhlE_egg_SYBR	Unknown	28.03		4812.74
	Egg_3	rhlE_egg_SYBR	Unknown	29.69		1577.13
	Egg_4	rhlE_egg_SYBR	Unknown	27.63		6290.73
	Egg_5	rhlE_egg_SYBR	Unknown	27.1		8946
	Egg_6	rhlE_egg_SYBR	Unknown	27.43		7175.05
	Egg_1	rhlE_egg_SYBR	Unknown	28.39		3777.57
	Egg_2	rhlE_egg_SYBR	Unknown	27.58		6482.95
	Egg_3	rhlE_egg_SYBR	Unknown	28.37		3829.32
	Egg_4	rhlE_egg_SYBR	Unknown	27.99		4931.76
	Egg_5	rhlE_egg_SYBR	Unknown	28.06		4707.78
	Egg_6	rhlE_egg_SYBR	Unknown	27.89		5270.74

## Sheet: raw_data-environmental-16S
Sample Name	Run	Task	Ct	StdDev Ct	count	count/ul
DMLsed1	4	sample	13.87	0.115326	11400000	2850000
GBsed4	3	sample	14.76	0.834386	2821000	705250
GBsed5	3	sample	14.4233	1.92765	5201100	1300275
GBsed6	3	sample	14.3767	1.08011	4053000	1013250
KBsed1	3	sample	15.92	NA	1104000	276000
KBsed10	3	sample	15.9533	1.71506	1.57113e+06	392783
KBsed11	3	sample	16.9	2.35185	1.02221e+06	255552
KBsed12	3	sample	20.1133	8.98707	1.52501e+06	381252
KBsed3	3	sample	12.5533	0.142945	12950000	3237500
KBsed6	3	sample	16.69	2.0591	1044300	261075
KBsed7	3	sample	15.3967	0.430039	1.67533e+06	418833
KBsed8	3	sample	15.7633	1.37449	1.64123e+06	410308
KBsed9	3	sample	15.4867	1.41649	2018900	504725
PJRI_Sv2gill	4	sample	16.0667	0.23029	2.67567e+06	668917
PJRI_Sv3gill	4	sample	20.1867	0.760614	187300	46825
PJRIfsw01-1	5	sample	12.2633	21.2407	0.0872	0.0218
PJRIfsw01-2	5	sample	11.4067	19.7569	0.653333	0.163333
PJRIfsw02	5	sample	0	0	0	0
PJRIfsw03	5	sample	0	0	0	0
PJRIfsw04-1	5	sample	21.3367	18.5148	10.79	2.6975
PJRIfsw04-2	5	sample	21.2367	18.3919	8.42	2.105
PJRIfsw2-1	3	sample	21.9633	2.62107	27960.3	6990.08
PJRIfsw2-2	3	sample	19.44	0.933381	94510	23627.5
PJRIfsw2-3	3	sample	13.65	0.240416	5838000	1459500
PJRIfsw2-4	3	sample	14.1	1.51321	5518500	1379625
PJRIfsw2-5	3	sample	23.6	10.3326	211767	52941.7
PJRIfsw3-1	3	sample	15.4433	1.77376	2.52613e+06	631533
PJRIfsw3-2	3	sample	17.84	0.424264	279250	69812.5
PJRIfsw3-3	3	sample	18.77	3.26908	500240	125060
PJRIfsw3-4	3	sample	39.84	#DIV/0!	0.02888	0.00722
PJRIfsw3-5	3	sample	30.975	0.247487	18.81	4.7025
PJRIfsw3-5redo	4	sample	31.9767	0.19218	70.8367	17.7092
PJRIfsw4	5	sample	0	0	0	0
PJRIsed2	3	sample	12.29	NA	15710000	3927500
PJRIsed21	4	sample	15.32	1.02587	4.96933e+06	1.24233e+06
PJRIsed22	4	sample	16.74	1.85491	2.45227e+06	613067
PJRIsed23	4	sample	#DIV/0!	#DIV/0!	#DIV/0!	#DIV/0!
PJRIsed23redo	5	sample	0	0	0	0
PJRIsed24	4	sample	17.25	1.40353	1521300	380325
PJRIsed25	3	sample	14.3667	0.474271	3590000	897500
PJRIsed26	3	sample	14.31	0.0565685	3583500	895875
PJRIsed27	5	sample	0	0	0	0
PJRIsed28	5	sample	15.4433	0.100167	4.93633e+06	1.23408e+06
PJRIsed29	5	sample	16.8533	0.371663	1.67267e+06	418167
PJRIsed3	3	sample	14.29	NA	3645000	911250
PJRIsed30	5	sample	19.1833	4.0353	1.11161e+06	277903
PJRIsed31	5	sample	16.84	0.141421	1645500	411375
PJRIsedMAX1	4	sample	17.2733	1.54533	1.58287e+06	395717
PJRIsedMAX2	4	sample	No Ct	No Ct	No Ct	No Ct
PJRIsedMAX2redo	5	sample	0	0	0	0
PJRIsedMAX3	5	sample	22.86	19.8603	2.3154	0.57885
SBsed10	4	sample	15.1967	0.492172	4.89333e+06	1.22333e+06
SBsed11	5	sample	0	0	0	0
SBsed12	5	sample	0	0	0	0
SBsed13	5	sample	0	0	0	0
SBsed6	4	sample	18.7733	4.19643	1.49098e+06	372746
SBsed7	4	sample	17.8167	0.941187	933567	233392
SBsed8	4	sample	16.3	0.121244	2.28033e+06	570083
SBsed9	4	sample	15.8	0.195192	3.18333e+06	795833
SKIOsedW1-1	4	sample	17.4167	0.120554	1.08833e+06	272083
SKIOsedW1-2	4	sample	17.59	0.252389	977333	244333
SKIOsedW13-1	4	sample	17.29	0.183303	1187000	296750
SKIOsedW13-2	4	sample	23.1367	0.217332	24740	6185
SKIOsedW4-1	4	sample	14.56	0.511566	7455000	1863750
SvPJRI7gill	5	sample	17.455	0.388909	1042050	260512
WHCsed10	5	sample	22.1167	0.750555	29326.7	7331.67
WHCsed7	5	sample	7.99	13.8391	2041.33	510.333
WHCsed8	5	sample	0	0	0	0
WHCsed9	5	sample	0	0	0	0
	2	17.34	2459000
	2	17.09	2970000
KBsed2	2	17.09	2984000	2.80433e+06	299149	4	701083
	2	16.92	3398000
	2	16.81	3676000
KBsed4	2	16.87	3527000	3.53367e+06	139120	4	883417
	2	17.1	2957000
	2	17.13	2890000
KBsed5	2	17.18	2770000	2.87233e+06	94743.5	4	718083
	2	No Ct	No Ct
	2	18.97	703800
PJRIsed1	2	17.82	1699000	1201400	703713	4	300350
	2	16.4	5056000
	2	16.37	5162000
PJRIsed9	2	16.32	5369000	5.19567e+06	159193	4	1.29892e+06
	2	26.07	3084
	2	25.94	3388
PJRIsed12	2	26.12	2969	3147	216.488	4	786.75
	2	16.19	5904000
	2	16.17	6000000
PJRIsed13	2	16.01	6808000	6.23733e+06	496537	4	1.55933e+06
	2	16.34	5299000
	2	16.29	5501000
PJRIsed14	2	16.14	6177000	5659000	459830	4	1414750
	2	17.4	2347000
	2	17.03	3105000
PJRIsed15	2	17.14	2865000	2.77233e+06	387403	4	693083
	2	16.69	4041000
	2	16.66	4126000
PJRIsed16	2	16.67	4088000	4085000	42579.3	4	1021250
	2	No Ct	No Ct
	2	16.6	4326000
DMLsed2	2	16.31	5416000	4871000	770746	4	1217750
	2	16.64	4191000
	2	16.64	4185000
DMLsed3	2	16.53	4553000	4.30967e+06	210754	4	1.07742e+06
	2	15.3	11720000
	2	15.13	13380000
WHCsed1	2	15.03	14350000	13150000	1330000	4	3287500
	2	16.27	5578000
	2	16.08	6467000
WHCsed2	2	16.1	6344000	6.12967e+06	481699	4	1.53242e+06
	2	16.8	3703000
	2	16.59	4370000
WHCsed3	2	16.67	4115000	4.06267e+06	336565	4	1.01567e+06
	2	15.64	8994000
	2	15.69	8680000
WHCsed4	2	15.46	10370000	9348000	898895	4	2337000
	2	17.28	2581000
	2	16.74	3894000
SRIsed1	2	16.74	3887000	3454000	756048	4	863500
	2	16.43	4940000
	2	16.23	5759000
SRIsed2	2	16.3	5441000	5380000	412893	4	1345000
	2	15.83	7822000
	2	15.78	8111000
SRIsed3	2	16.07	6511000	7.48133e+06	852667	4	1.87033e+06
	2	16.28	5510000
	2	16.13	6215000
SBsed1	2	16.23	5751000	5.82533e+06	358330	4	1.45633e+06
	2	20.21	273500
	2	20.23	269600
SBsed3	2	20.24	267800	270300	2913.76	4	67575
	2	20.19	277000
	2	20.55	210000
GBsed1	2	20.12	293400	260133	44184.3	4	65033.3
	2	20.13	289400
	2	19.81	371000
PJRIfsw1	2	19.84	363600	341333	45127.5	4	85333.3
	2	21.12	135800
	2	21.77	82560
PJRIfsw2	2	20.91	159900	126087	39574.4	4	31521.7
NTC	2	34.91	3.53
NTC	2	34.67	4.27
NTC	2	34.24	5.89	4.56333	1.20703
GBsed3	1	584700
	1	2840000
	1	No Ct	1712350	1.59474e+06	4	428088
W9sed2	1	2567000
	1	2610000
	1	2514000	2.56367e+06	48086.7	4	640917
KBfsw1	1	182900
	1	204800
	1	202300	196667	11987.6	4	49166.7
KBfsw2	1	702800
	1	561900
	1	651500	638733	71312.3	4	159683
SRIfsw	1	697100
	1	686400
	1	705300	696267	9477.52	4	174067
SBfsw	1	357100
	1	718100
	1	1016000	697067	329953	4	174267
DMLfsw	1	2200
	1	2772
	1	3025	2665.67	422.654	4	666.417
GBsed2	1	6086000
	1	5543000
	1	6121000	5.91667e+06	324078	4	1.47917e+06
SBsed4	1	11280000
	1	No Ct
	1	NA	11280000	#DIV/0!	4	2820000
SBsed5	1	6995000
	1	7749000
	1	7972000	7572000	511985	4	1893000
WHCsed5	1	2742000
	1	3637000
	1	3213000	3.19733e+06	447706	4	799333
WHCsed6	1	6233000
	1	5941000
	1	7430000	6.53467e+06	789007	4	1.63367e+06
PJRIsed17	1	3267000
	1	3874000
	1	4016000	3719000	397830	4	929750
PJRIsed18	1	4956000
	1	6218000
	1	6065000	5.74633e+06	688711	4	1.43658e+06
PJRIsed19	1	5712000
	1	5684000
	1	5592000	5.66267e+06	62780	4	1.41567e+06
PJRIsed20	1	7079000
	1	7121000
	1	7550000	7250000	260655	4	1812500

## Sheet: summary_data
Sample	Plate	Detection dye	Type	Average Ct	StdDev Ct	Count	Extracted qty	Amplified volume (ml)	Extracted volume (ml)	Count/	unit
egg 1	1	SYBR	unknown	30.9933	0.654319	5.87	1 egg	4	50	73.375	egg
egg 2	1	SYBR	unknown	29.05		18.6	1 egg	4	50	232.5	egg
egg 3	1	SYBR	unknown	33.8267	0.25482	1.01	1 egg	4	50	12.625	egg
egg 4	1	SYBR	unknown	32.3133	1.07188	2.91	1 egg	4	50	36.375	egg
egg 5	1	SYBR	unknown	36.31	1.73663	<1	1 egg	4	50	<1	egg
egg 6	1	SYBR	unknown	33.12	1.18882	1.83	1 egg	4	50	22.875	egg
egg 7	2	SYBR	unknown	33.38	0.407308	2.35	1 egg	4	50	29.375	egg
egg 8	2	SYBR	unknown	34.5067	0.903567	1.56	1 egg	4	50	19.5	egg
egg 9	1	SYBR	unknown	33.67	0.608112	1.14	1 egg	4	50	14.25	egg
egg 10	1	SYBR	unknown	31.8767	0.43062	3.34	1 egg	4	50	41.75	egg
3 eggs	2	SYBR	unknown	30.76		14.22	3 eggs	4	50	59.25	egg
4 eggs	2	SYBR	unknown	29.97		23.11	4 eggs	4	50	72.2188	egg
50 eggs	2	SYBR	unknown	24.84		540.8	50 eggs	4	50	135.2	egg
bleached egg 1	1	SYBR	unknown	28.61	2.84257	28.96	1 egg	4	50	362	egg
bleached egg 2	1	SYBR	unknown	32	0.996243	3.45	1 egg	4	50	43.125	egg
bleached egg 3	1	SYBR	unknown	32.2833	1.03026	2.89	1 egg	4	50	36.125	egg
bleached egg 4	1	SYBR	unknown	36.1133	1.08394	<1	1 egg	4	50	<1	egg
bleached egg 5	1	SYBR	unknown	34.2133	1.62346	1.12	1 egg	4	50	14	egg
bleached egg 6	1	SYBR	unknown	36.86	3.54368	<1	1 egg	4	50	<1	egg
bleached egg 7	2	SYBR	unknown	35.37	1.20208	<1	1 egg	4	50	29.375	egg
bleached egg 8	1	SYBR	unknown	33.705	0.0494975	1.08	1 egg	4	50	13.5	egg
bleached egg 9	1	SYBR	unknown	29.8933	1.86039	14.89	1 egg	4	50	186.125	egg
bleached egg 10	1	SYBR	unknown	36.57	1.19637	<1	1 egg	4	50	<1	egg
bleached egg 11	1	SYBR	unknown	30.52	0.991363	8.45	1 egg	4	50	105.625	egg
bleached egg 12	1	SYBR	unknown	36.21	0.639296	<1	1 egg	4	50	<1	egg
FSW	2	SYBR	unknown	35.1967	1.62161	<1	60 ml seawater	4	100	<1	ml
prespawn FSW	2	SYBR	unknown	31.4633	0.397157	5.78	60 ml seawater	4	100	0.00240833	ml
Standard 1e7	1	SYBR	standard	7.495	0.0450925	10000000
Standard 1e6	1	SYBR	standard	11.375	0.185562	1000000
Standard 1e5	1	SYBR	standard	14.735	0.06245	100000
Standard 1e4	1	SYBR	standard	18.29	0.187172	10000
Standard 1e3	1	SYBR	standard	22.125	0.31	1000
Standard 1e2	1	SYBR	standard	25.815	0.0650641	100
Standard 1e1	1	SYBR	standard	30.495	0.924356	10
Standard 1e0	1	SYBR	standard	34.67	2.74357	1
NTC	1	SYBR	NTC	No Ct	No Ct	0
Standard 1e7	2	SYBR	standard	9.07	0.542863	10000000
Standard 1e6	2	SYBR	standard	12.9367	0.592312	1000000
Standard 1e5	2	SYBR	standard	16.0167	0.119304	100000
Standard 1e4	2	SYBR	standard	19.6867	0.221435	10000
Standard 1e3	2	SYBR	standard	23.77	0.78	1000
Standard 1e2	2	SYBR	standard	27.42	0.121655	100
Standard 1e1	2	SYBR	standard	31.78	0.363868	10
Standard 1e0	2	SYBR	standard	35.11		1
NTC	2	SYBR	NTC	No Ct	No Ct	0
